# Supplementary material for: Lethal and behavioral effects of synthetic and organic insecticides on Spodoptera exigua and its predator Podisus maculiventris
Source: PLoS One. 2018 Nov 8;13(11):e0206789. doi: 10.1371/journal.pone.0206789 (PMC6224277; doi:10.1371/journal.pone.0206789)
Supplement: S17 File — (XLS) [file pone.0206789.s017.xls]

## Sheet: BAW-Vial-Treated diet 
Beet Armyworm (24h)- Vials								Beet Armyworm (24h)- Treated Diet
1) CORAGEN								1) CORAGEN
	Tested	Died	%Mortality						Tested	Died	%Mortality
Control	36	0	0					Control	50	0	0
0.005	36	1	2.77778					0.005	50	0	0
0.025	36	4	11.1111					0.05	50	6	12
0.05	36	10	27.7778					0.5	50	15	30
0.25	36	14	38.8889					1	50	27	54
0.5	36	21	58.3333					2.5	50	32	64
1	36	24	66.6667					5	50	41	82
2.5	36	26	72.2222					10	50	49	98	1	400
5	36	33	91.6667		324
2) PYGANIC								2)PYGANIC
	Tested	Died	%Mortality						Tested	Died	%Mortality
Control	36	0	0					Control	50	0	0
0.05	36	0	0					0.005	50	0	0
0.5	36	2	5.55556					0.05	50	2	4
1	36	5	13.8889					0.5	50	7	14
2.5	36	12	33.3333					1	50	11	22
5	36	16	44.4444					2.5	50	13	26
10	36	21	58.3333					5	50	18	36
25	36	27	75					10	50	22	44
50	36	35	97.2222	1	324			25	50	26	52
								50	50	39	78
								100	50	45	90		550
3) ENTRUST								250	50	50	100
	Tested	Died	%Mortality
Control	36	0	0					3) ENTRUST
0.5	36	2	5.55556
1	36	6	16.6667						Tested	Died	%Mortality
2.5	36	14	38.8889					Control	50	0	0
5	36	21	58.3333					0.5	50	2	4
10	36	28	77.7778					1	50	8	16
25	36	31	86.1111					2.5	50	17	34
50	36	35	97.2222	1	288			5	50	29	58
								10	50	34	68
								25	50	44	88
4) AZERA								50	50	48	96		400
								100	50	50	100
	Tested	Died	%Mortality
Control	36	0	0
0.5	36	0	0					4) AZERA
1	36	2	5.55556
2.5	36	6	16.6667						Tested	Died	%Mortality
5	36	8	22.2222					Control	50	0	0
10	36	20	55.5556					0.5	50	1	2
25	36	28	77.7778					1	50	2	4
50	36	31	86.1111					2.5	50	4	8
100	36	34	94.4444		324			5	50	5	10
250	36	36	100					10	50	6	12
								25	50	12	24
								50	50	41	82
								100	50	47	94		450
								250	50	50	100

## Sheet: Podisus-Vial-Oral toxicity
Podisus maculiventris (24h)- Vials								Podisus maculiventris (24h)- Oral Toxicity
1) CORAGEN								1) CORAGEN
	Tested	Died	%Mortality						Tested	Died	%Mortality
Control	30	0	0					Control	30	0	0
0.0005	30	0	0					5	30	0	0
0.005	30	0	0					10	30	0	0
0.05	30	0	0					25	30	0	0
0.5	30	0	0					50	30	0	0
1	30	0	0					100	30	6	20
2.5	30	0	0					250	30	10	33.3333
5	30	0	0					500	30	17	56.6667		240
50	30	0	0
500	30	0	0		300
2) PYGANIC								2) PYGANIC
	Tested	Died	%Mortality						Tested	Died	%Mortality
Control	39	0	0					Control	30	0	0
1	39	0	0					5	30	3	10
2.5	39	7	17.9487					10	30	5	16.6667
5	39	17	43.5897					25	30	12	40
10	39	22	56.4103					50	30	16	53.3333
25	39	27	69.2308					100	30	18	60
50	39	33	84.6154					250	30	25	83.3333
100	39	38	97.4359		312			500	30	28	93.3333		240
3) ENTRUST								3) ENTRUST
	Tested	Died	%Mortality						Tested	Died	%Mortality
Control	36	0	0					Control	30	0	0
10	36	2	5.55556					1	30	3	10
25	36	5	13.8889					2.5	30	4	13.3333
50	36	14	38.8889					5	30	6	20
100	36	23	63.8889					10	30	7	23.3333
250	36	33	91.6667		216			25	30	15	50
500	36	36	100					50	30	23	76.6667
								100	30	28	93.3333		240
								250	30	30	100
4) AZERA								500	30	30	100
	Tested	Died	%Mortality
Control	36	0	0					4) AZERA
0.5	36	0	0
1	36	1	2.77778						Tested	Died	%Mortality
2.5	36	2	5.55556					Control	30	0	0
5	36	5	13.8889					5	30	4	13.3333
10	36	8	22.2222					10	30	10	33.3333
25	36	14	38.8889					25	30	12	40
50	36	18	50					50	30	14	46.6667
100	36	25	69.4444					100	30	16	53.3333
250	36	31	86.1111		324			250	30	21	70
500	36	36	100					500	30	27	90		240

## Sheet: SAS wih rep
Beet Armyworm (24h)- Vials								*Beet Armyworm (24h)- Vials						*Dados usados para analise SAS com repeticoes								Beet Armyworm (24h)- Treated Diet							Beet Armyworm (24h)- Treated Diet									Podisus maculiventris (24h)- Vials							Podisus maculiventris (24h)- Vials
1) CORAGEN								1) CORAGEN														1) CORAGEN							1) CORAGEN									1) CORAGEN							1) CORAGEN
	Tested	Died	%Mortality						Tested	Died	%Mortality												Tested	Died	%Mortality					Tested	Died	%Mortality							Tested	Died	%Mortality					Tested	Died	%Mortality
0	36	0	0					0.005	9	0												0	50	0	0				0.05	10	1							0	30	0	0
0.005	36	1	2.77778					0.005	9	1												0.005	50	0	0				0.05	10	1							0.0005	30	0	0
0.025	36	4	11.1111					0.005	9	0												0.05	50	6	12				0.05	10	1							0.005	30	0	0
0.05	36	10	27.7778					0.005	9	0												0.5	50	15	30				0.05	10	1							0.05	30	0	0
0.25	36	14	38.8889					0.025	9	1												1	50	27	54				0.05	10	2							0.5	30	0	0
0.5	36	21	58.3333					0.025	9	1												2.5	50	32	64				0.5	10	3							1	30	0	0
1	36	24	66.6667					0.025	9	1												5	50	41	82				0.5	10	3							2.5	30	0	0
2.5	36	26	72.2222					0.025	9	1												10	50	49	98	1	400		0.5	10	3							5	30	0	0
5	36	33	91.6667		324			0.05	9	2																			0.5	10	3							50	30	0	0
								0.05	9	3																			0.5	10	3							500	30	0	0		300
								0.05	9	3																			1	10	5
								0.05	9	2																			1	10	5
								0.25	9	3																			1	10	6							2) PYGANIC							2) PYGANIC
								0.25	9	3																			1	10	5
								0.25	9	4																			1	10	6								Tested	Died	%Mortality					Tested	Died	%Mortality
								0.25	9	4																			2.5	10	6							0	39	0	0				2.5	13	2
								0.5	9	5																			2.5	10	6							1	39	0	0				2.5	13	3
								0.5	9	5																			2.5	10	7							2.5	39	7	17.9487				2.5	13	2
								0.5	9	6																			2.5	10	6							5	39	17	43.5897				5	13	6
								0.5	9	5																			2.5	10	7							10	39	22	56.4103				5	13	5
								1	9	6																			5	10	8							25	39	27	69.2308				5	13	6
								1	9	7																			5	10	8							50	39	33	84.6154				10	13	7
								1	9	6																			5	10	8							100	39	38	97.4359		312		10	13	7
								1	9	5																			5	10	8														10	13	8
								2.5	9	7																			5	10	9														25	13	9
								2.5	9	6																			10	10	10														25	13	9
								2.5	9	6																			10	10	10														25	13	9
								2.5	9	7																			10	10	9														50	13	11
								5	9	8																			10	10	10														50	13	11
								5	9	8																			10	10	10														50	13	11
								5	9	8																																			100	13	13
								5	9	9												2)PYGANIC							2)PYGANIC																100	13	13
																																													100	13	12
2) PYGANIC								2) PYGANIC															Tested	Died	%Mortality					Tested	Died	%Mortality
																						0	50	0	0				0.05	10	1							3) ENTRUST							3) ENTRUST
	Tested	Died	%Mortality						Tested	Died	%Mortality											0.005	50	0	0				0.05	10	0
0	36	0	0					0.5	9	1												0.05	50	2	4				0.05	10	0								Tested	Died	%Mortality					Tested	Died	%Mortality
0.05	36	0	0					0.5	9	0												0.5	50	7	14				0.05	10	1							0	36	0	0				10	9	0
0.5	36	2	5.55556					0.5	9	1												1	50	11	22				0.05	10	0							10	36	2	5.55556				10	9	1
1	36	5	13.8889					0.5	9	0												2.5	50	13	26				0.5	10	1							25	36	5	13.8889				10	9	1
2.5	36	12	33.3333					1	9	1												5	50	18	36				0.5	10	1							50	36	14	38.8889				10	9	0
5	36	16	44.4444					1	9	1												10	50	22	44				0.5	10	2							100	36	23	63.8889				25	9	1
10	36	21	58.3333					1	9	2												25	50	26	52				0.5	10	2							250	36	33	91.6667		216		25	9	1
25	36	27	75					1	9	1												50	50	39	78				0.5	10	1							500	36	36	100				25	9	2
50	36	35	97.2222	1	324			2.5	9	3												100	50	45	90		550		1	10	2														25	9	1
								2.5	9	3												250	50	50	100				1	10	2														50	9	4
								2.5	9	3																			1	10	2														50	9	3
								2.5	9	3																			1	10	2														50	9	4
								5	9	4																			1	10	3														50	9	3
								5	9	4																			2.5	10	3														100	9	6
								5	9	4																			2.5	10	3														100	9	6
								5	9	4																			2.5	10	3														100	9	6
								10	9	5																			2.5	10	2														100	9	5
								10	9	5																			2.5	10	2														250	9	9
								10	9	5																			5	10	4														250	9	8
								10	9	6																			5	10	4														250	9	8
								25	9	7																			5	10	3														250	9	8
								25	9	7																			5	10	3
								25	9	6																			5	10	4							4) AZERA							4) AZERA
								25	9	7																			10	10	4
								50	9	8																			10	10	5								Tested	Died	%Mortality					Tested	Died	%Mortality
								50	9	9																			10	10	4							Control	36	0	0				1	9	1
								50	9	9																			10	10	4							0.5	36	0	0				1	9	0
								50	9	9																			10	10	5							1	36	1	2.77778				1	9	0
																													25	10	5							2.5	36	2	5.55556				1	9	0
3) ENTRUST								3) ENTRUST																					25	10	5							5	36	5	13.8889				2.5	9	1
																													25	10	5							10	36	8	22.2222				2.5	9	1
	Tested	Died	%Mortality						Tested	Died	%Mortality																		25	10	5							25	36	14	38.8889				2.5	9	0
0	36	0	0					0.5	9	1																			25	10	6							50	36	18	50				2.5	9	0
0.5	36	2	5.55556					0.5	9	0																			50	10	8							100	36	25	69.4444				5	9	1
1	36	6	16.6667					0.5	9	1																			50	10	8							250	36	31	86.1111		324		5	9	1
2.5	36	14	38.8889					0.5	9	0																			50	10	8							500	36	36	100				5	9	2
5	36	21	58.3333					1	9	2																			50	10	8														5	9	1
10	36	28	77.7778					1	9	1																			50	10	7														10	9	2
25	36	31	86.1111					1	9	2																			100	10	9														10	9	2
50	36	35	97.2222	1	288			1	9	1																			100	10	9														10	9	2
								2.5	9	4																			100	10	9														10	9	2
								2.5	9	4																			100	10	9														25	9	3
								2.5	9	3																			100	10	9														25	9	3
								2.5	9	3																																			25	9	4
								5	9	5												3) ENTRUST							3) ENTRUST																25	9	4
								5	9	5																																			50	9	5
								5	9	5													Tested	Died	%Mortality					Tested	Died	%Mortality													50	9	4
								5	9	6												0	50	0	0				0.5	10	0														50	9	5
								10	9	7												0.5	50	2	4				0.5	10	0														50	9	4
								10	9	7												1	50	8	16				0.5	10	0														100	9	6
								10	9	7												2.5	50	17	34				0.5	10	1														100	9	6
								10	9	7												5	50	29	58				0.5	10	1														100	9	6
								25	9	8												10	50	34	68				1	10	2														100	9	7
								25	9	8												25	50	44	88				1	10	2														250	9	8
								25	9	8												50	50	48	96		400		1	10	2														250	9	8
								25	9	7												100	50	50	100				1	10	1														250	9	7
								50	9	9																			1	10	1														250	9	8
								50	9	9																			2.5	10	3
								50	9	9																			2.5	10	3
								50	9	8																			2.5	10	3
																													2.5	10	4
4) AZERA								4) AZERA																					2.5	10	4
																													5	10	6
	Tested	Died	%Mortality						Tested	Died	%Mortality																		5	10	6
0	36	0	0					1	9	1																			5	10	6
0.5	36	0	0					1	9	0																			5	10	6
1	36	2	5.55556					1	9	1																			5	10	5
2.5	36	6	16.6667					1	9	0																			10	10	7
5	36	8	22.2222					2.5	9	1																			10	10	7
10	36	20	55.5556					2.5	9	2																			10	10	7
25	36	28	77.7778					2.5	9	1																			10	10	7
50	36	31	86.1111					2.5	9	2																			10	10	6
100	36	34	94.4444		324			5	9	2																			25	10	9
250	36	36	100					5	9	2																			25	10	8
								5	9	2																			25	10	9
								5	9	2																			25	10	9
								10	9	5																			25	10	9
								10	9	5																			50	10	10
								10	9	5																			50	10	10
								10	9	5																			50	10	9
								25	9	7																			50	10	9
								25	9	7																			50	10	10
								25	9	7
								25	9	7												4) AZERA							4) AZERA
								50	9	8
								50	9	8													Tested	Died	%Mortality					Tested	Died	%Mortality
								50	9	8												0	50	0	0				0.5	10	1
								50	9	7												0.5	50	1	2				0.5	10	0
								100	9	9												1	50	2	4				0.5	10	0
								100	9	8												2.5	50	4	8				0.5	10	0
								100	9	9												5	50	12	24				0.5	10	0
								100	9	8												10	50	25	50				1	10	1
																						25	50	32	64				1	10	0
																						50	50	41	82				1	10	0
																						100	50	47	94		450		1	10	1
																						250	50	50	100				1	10	0
																													2.5	10	1
																													2.5	10	1
																													2.5	10	1
																													2.5	10	0
																													2.5	10	1
																													5	10	2
																													5	10	2
																													5	10	3
																													5	10	3
																													5	10	2
																													10	10	5
																													10	10	5
																													10	10	5
																													10	10	5
																													10	10	5
																													25	10	6
																													25	10	6
																													25	10	6
																													25	10	7
																													25	10	7
																													50	10	8
																													50	10	8
																													50	10	8
																													50	10	8
																													50	10	9
																													100	10	10
																													100	10	9
																													100	10	9
																													100	10	9
																													100	10	10
